# Supplementary material for: Polymeric microneedles enable simultaneous delivery of cancer immunomodulatory drugs and detection of skin biomarkers
Source: Theranostics. 2023 Jan 1;13(1):1–15. doi: 10.7150/thno.73966 (PMC9800729; doi:10.7150/thno.73966)
Supplement: Supplementary file 1 — Supplementary figures and tables. [file thnov13p0001s1.pdf]

# **Polymeric microneedles enable simultaneous delivery of cancer immunomodulatory drugs and detection of skin biomarkers**

Pere Dosta<sup>1,2,6\*</sup>, Núria Puigmal<sup>1,2,6\*</sup>, Alexander M. Cryer<sup>1,2,6</sup>, Alma L. Rodríguez<sup>1,2</sup>, Ella Scott<sup>3</sup>, Ralph Weissleder<sup>3,4,5</sup>, Miles A. Miller<sup>3,4</sup>, Natalie Artzi<sup>1,2,6</sup>

<sup>1</sup>Institute for Medical Engineering and Science  
Massachusetts Institute of Technology  
Cambridge, MA 02139

<sup>2</sup>Department of Medicine  
Division of Engineering in Medicine  
Brigham and Women's Hospital  
Harvard Medical School  
Boston, MA 02115  
\*E-mail: nartzi@mit.edu; nartzi@bwh.harvard.edu

<sup>3</sup>Center for Systems Biology  
Massachusetts General Hospital Research Institute  
Boston, MA 02114  
\*E-mail: miles.miller@mgh.harvard.edu

<sup>4</sup>Department of Radiology  
Massachusetts General Hospital  
Harvard Medical School  
Boston, MA 02114

<sup>5</sup>Department of Systems Biology  
Harvard Medical School

<sup>6</sup>Wyss Institute for Biologically Inspired Engineering  
Harvard University  
Boston, MA, 02115

Keywords: microneedles, immunotherapy, cancer, poly(beta-amino ester)s, theranostics

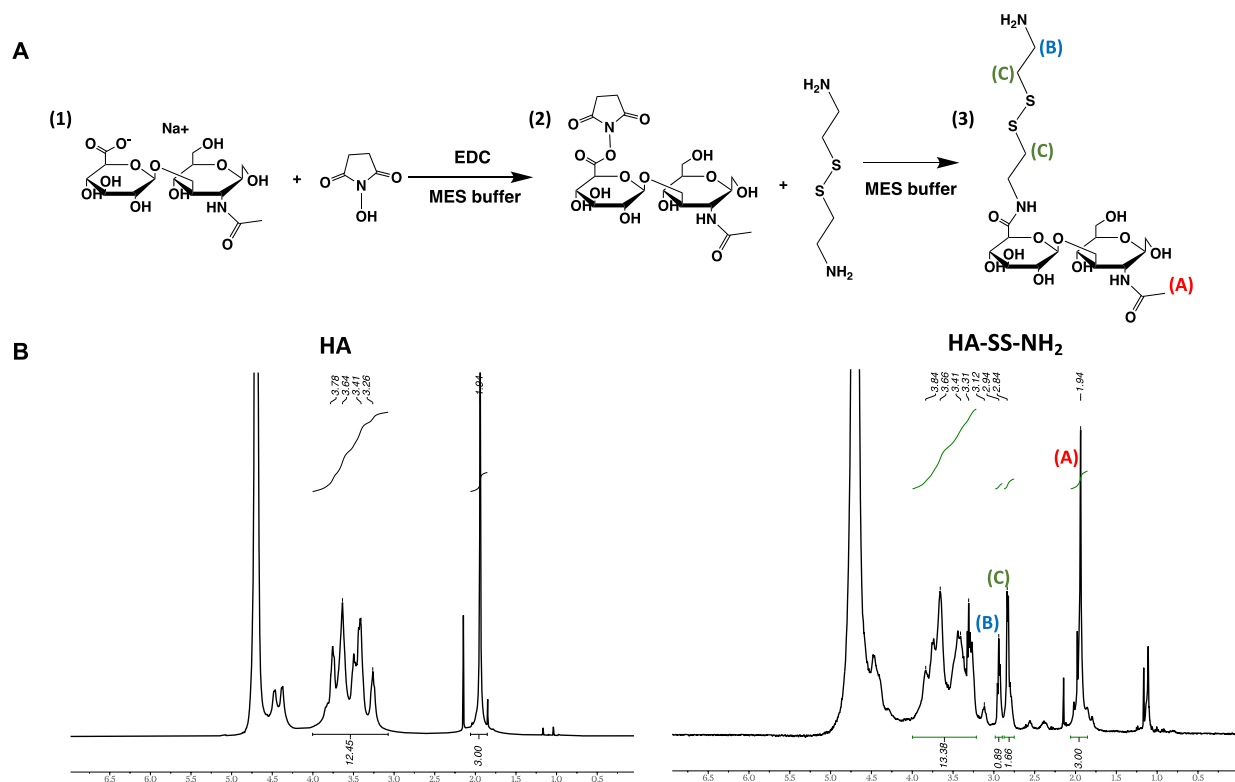

**Figure S1: A,** Synthesis, and chemical structure of HA-SS-NH<sub>2</sub> polymer. **B,** <sup>1</sup>H-NMR of unmodified HA and HA-SS-NH<sub>2</sub> polymer (400MHz, DMSO-*d*<sub>6</sub>, TMS) (ppm)

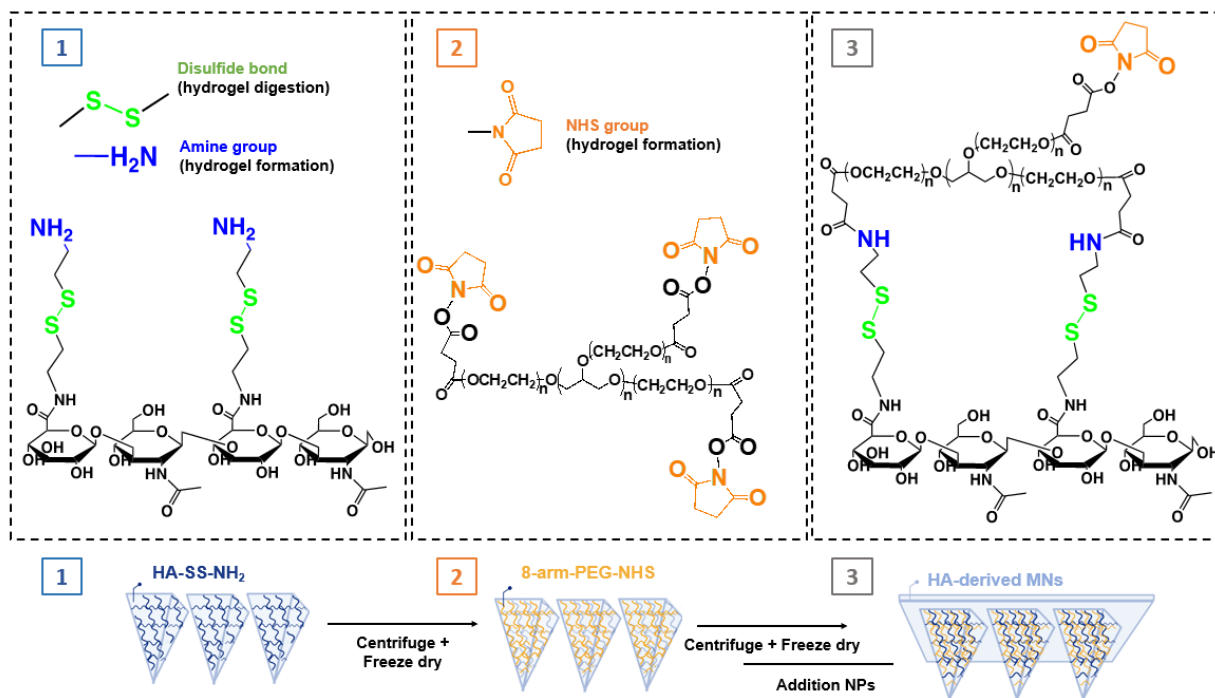

**Figure S2: HA-based MN platform for simultaneous transdermal drug delivery and Interstitial fluid Sampling for cancer treatment.** HA-based MN fabrication was performed by casting an aqueous amine-modified HA (HA-SS-NH<sub>2</sub>) solution into the PDMS mold by centrifugation and crosslinked using the NHS-terminated 8-arm PEG crosslinker. CpG Nanoparticles were loaded and a PLGA back layer was added (bottom scheme).

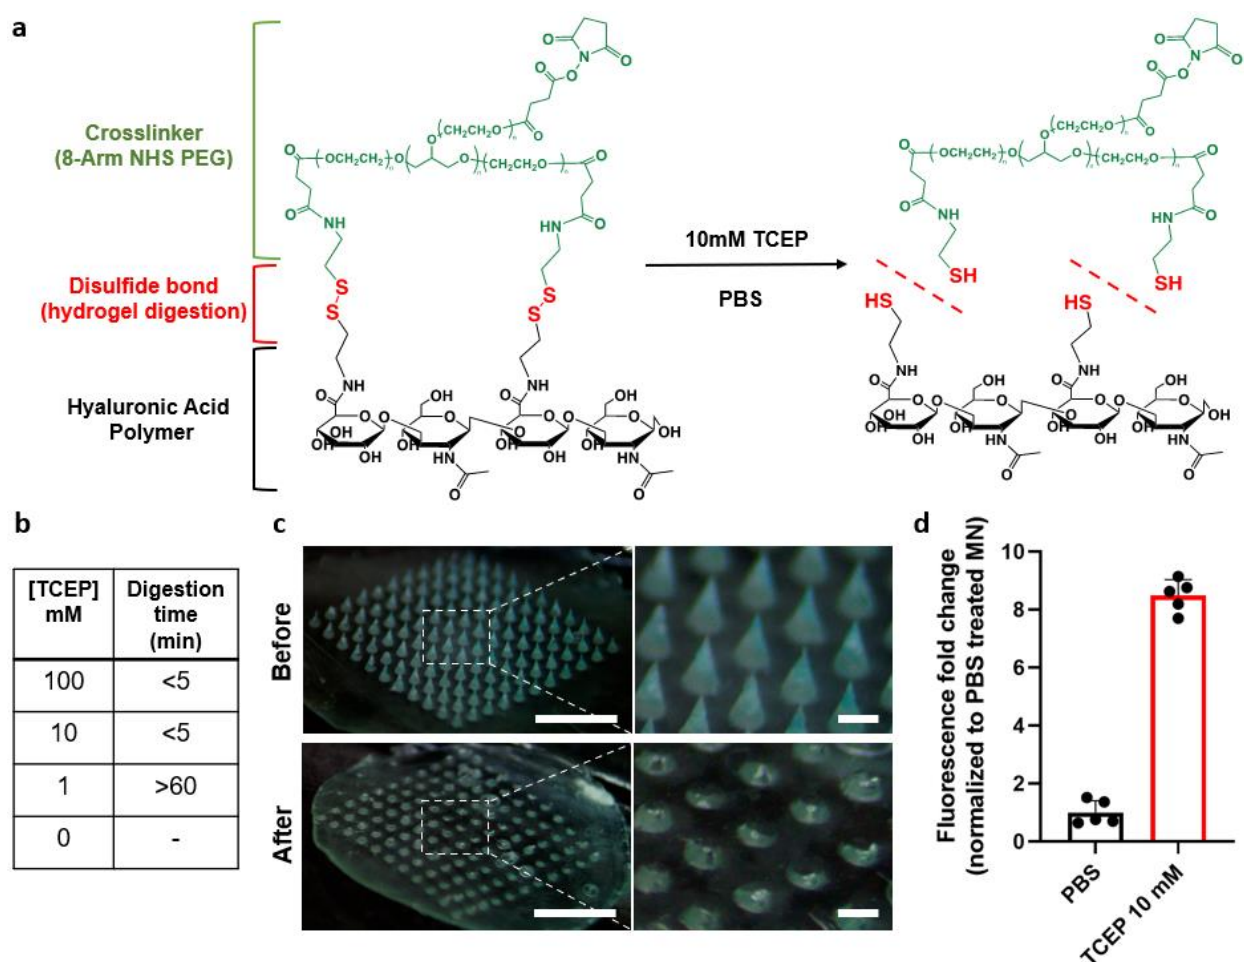

**Figure S3: On-demand degradation of the MNs under reducing conditions for subsequent ISF recovery.** **A**, Chemical structure of the HA-SS-NH<sub>2</sub> modified with a disulfide bond for on-demand degradation when incubated with the reducing agent TCEP. **B**, Digestion times of MNs using varying concentrations of the reducing agent TCEP. **C**, Microscopy images of the hydrogel-based MNs before (top) and after (bottom) incubation for 5 minutes with a 10 mM TCEP solution (Scale bar left = 2 mm, right = 300  $\mu$ m). **D**, Fluorescence evaluation of AF647-conjugated HA that has been released into the supernatant after incubation of MNs with PBS (negative control) or on-demand digestion with TCEP (10 mM TCEP) for 5 min (n = 5).

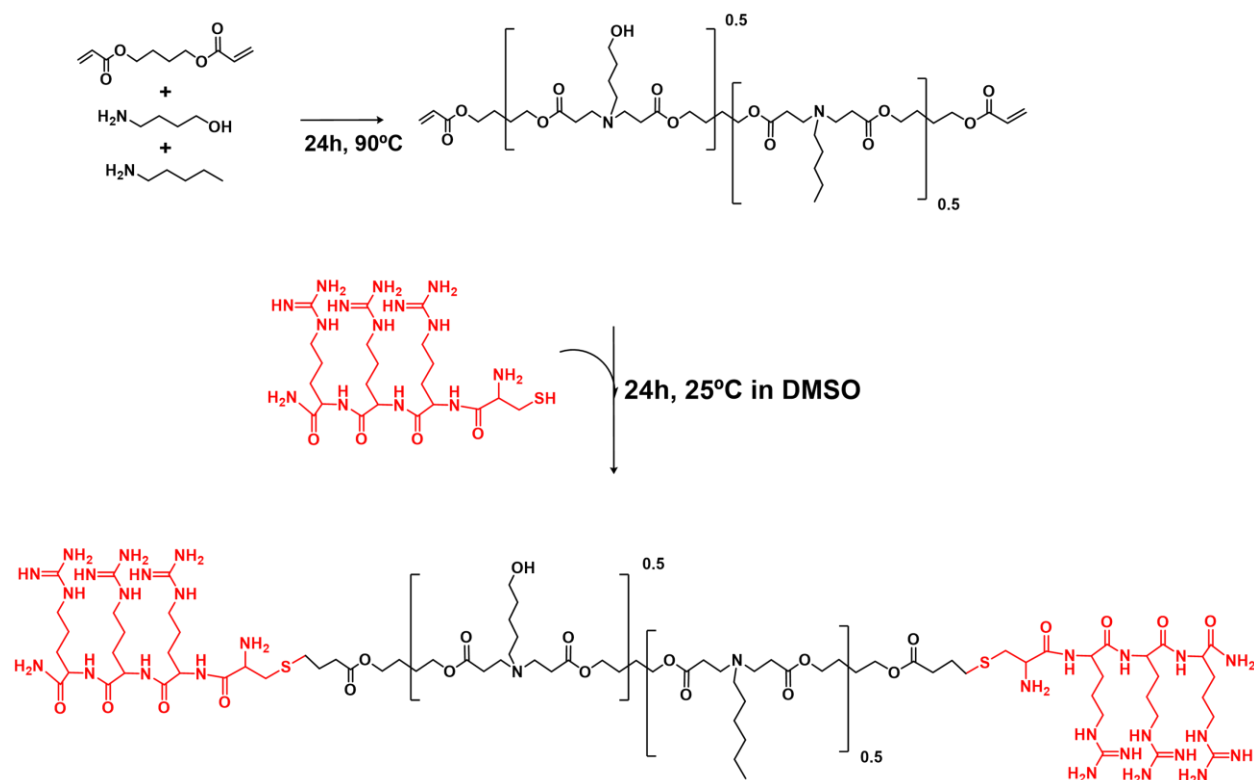

**Figure S4: Synthesis of arginine modified poly (beta-amino) formulation. A,** Synthesis of pBAE polymer. A mixture of 5-amino-1-pentanol, hexylamine, and 1,4-butanediol diacrylate (0.5:0.5:1.2) were used for the synthesis of pBAE C6 polymer. **B,** Arginine-modified pBAE are formulated mixing acrylate-terminate pBAE polymer with polyarginine peptide containing a cysteine amino acid (Cys-Arg-Arg-Arg).

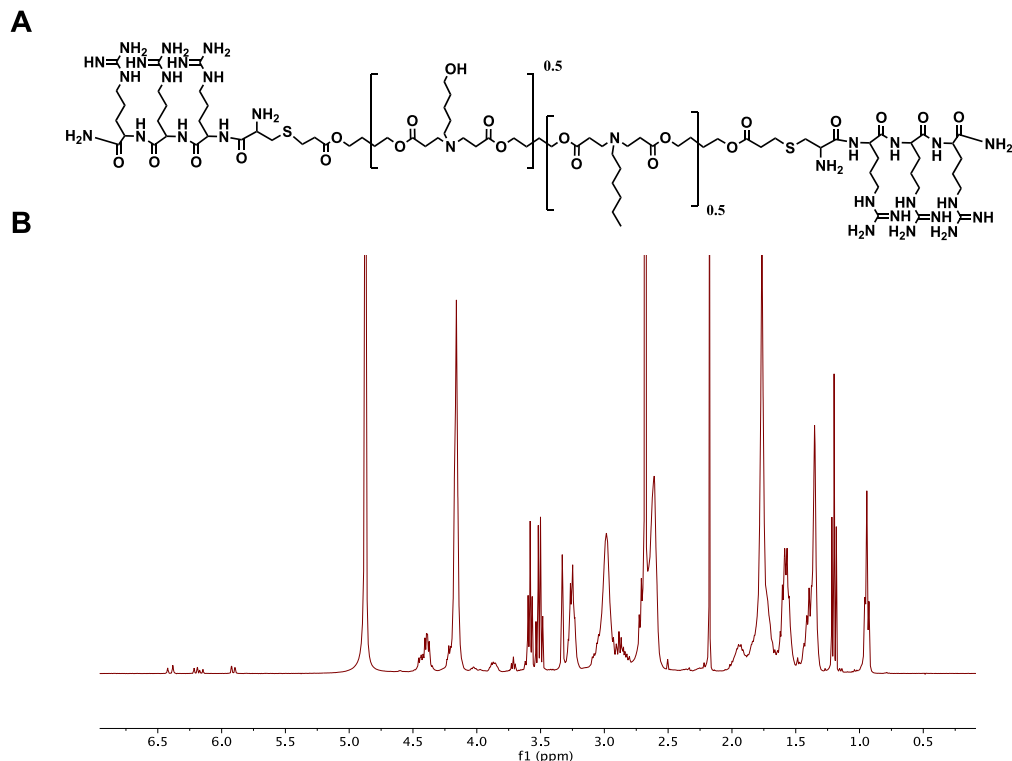

**Figure S5: A,** Chemical structure of C6-CR3 Polymer. **B,**  $^1\text{H}$ -NMR of C6-CR3 Polymer (400MHz, Methanol- $d_4$ , TMS) (ppm):  $\delta$  = 4.41-4.33 (br,  $\text{NH}_2\text{-C(=O)-CH-NH-C(=O)-CH-NH-C(=O)-CH-NH-C(=O)-CH-CH}_2\text{-}$ ), 4.16 (t,  $\text{CH}_2\text{-CH}_2\text{-O}$ ), 3.58 (t,  $\text{CH}_2\text{-CH}_2\text{-OH}$ ), 3.25 (br,  $\text{NH}_2\text{-C(=NH)-NH-CH}_2\text{-}$ ,  $\text{OH-(CH}_2\text{)}_4\text{-CH}_2\text{-N-}$ ), 3.04 (t,  $\text{CH}_2\text{-CH}_2\text{-N-}$ ), 2.82 (dd,  $\text{-CH}_2\text{-S-CH}_2\text{}$ ), 2.48 (br,  $\text{-N-CH}_2\text{-CH}_2\text{-C(=O)-O}$ ), 1.90 (m,  $\text{NH}_2\text{-C(=NH)-NH-(CH}_2\text{)}_2\text{-CH}_2\text{-CH-}$ ), 1.73 (br,  $\text{-O-CH}_2\text{-CH}_2\text{-CH}_2\text{-CH}_2\text{-O}$ ), 1.69 (m,  $\text{NH}_2\text{-C(=NH)-NH-CH}_2\text{-CH}_2\text{-CH}_2\text{-}$ ), 1.56 (br,  $\text{-CH}_2\text{-CH}_2\text{-CH}_2\text{-CH}_2\text{-OH}$ ), 1.39 (br,  $\text{-N-(CH}_2\text{)}_2\text{-CH}_2\text{-(CH}_2\text{)}_2\text{-OH}$ ), 0.88 (t,  $\text{CH}_2\text{-CH}_2\text{-CH}_3$ ).

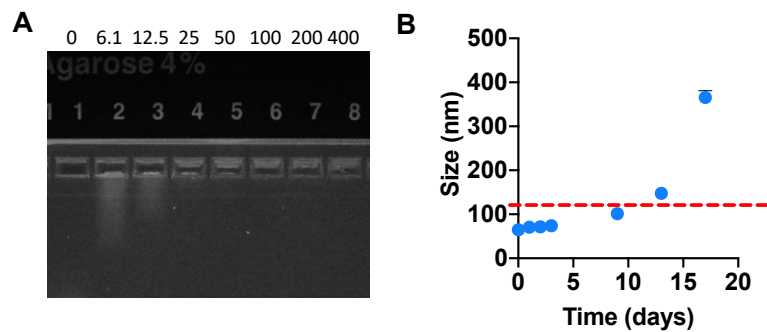

**Figure S6: A,** Agarose retardation assay of arginine-modified pBAE. Nanoparticles were formed using CpG and arginine-modified pBAE at different w/w ratios and loaded onto an agarose gel to assess CpG mobility by electrophoresis. **B,** Stability study of CpG-NPs in PBS (determined by DLS).

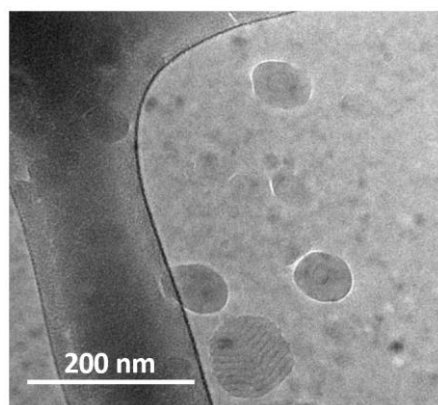

**Figure S7:** Cryo-Transmission electron microscopy (TEM) images of the CpG-NPs. Scale bar = 200 nm.

**Table S1:** Biophysical characterization of CpG- and CpC-containing nanoparticles as determined by dynamic light scattering (DLS).

| <b>Particle</b>          | <b>Size (nm)</b> | <b>Surface charge (mV)</b> | <b>Polydispersity Index (PDI)</b> |
|--------------------------|------------------|----------------------------|-----------------------------------|
| CpG-NPs                  | 62.51 ± 0.59     | 23.1 ± 2.04                | 0.115 ± 0.02                      |
| CpC <sub>Ctrl</sub> -NPs | 59.72 ± 3.8      | 21 ± 2.24                  | 0.207 ± 0.02                      |

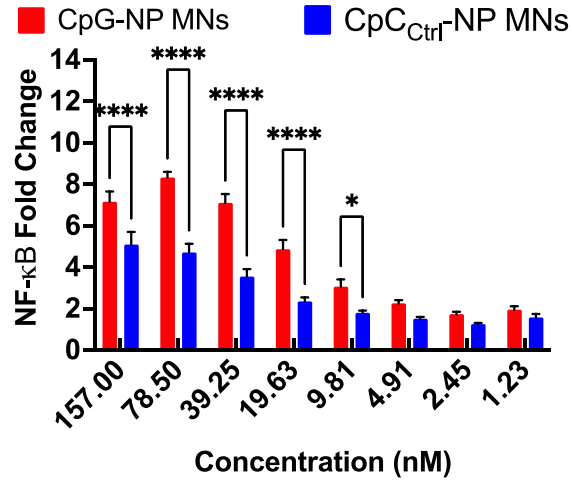

**Figure S8:** Dose-response of the NF-κB response produced by CpG-NP and CpC-Crt-NP released from the MNs in mouse TLR9 Reporter HEK293 cell line (n = 4 biologically independent samples).

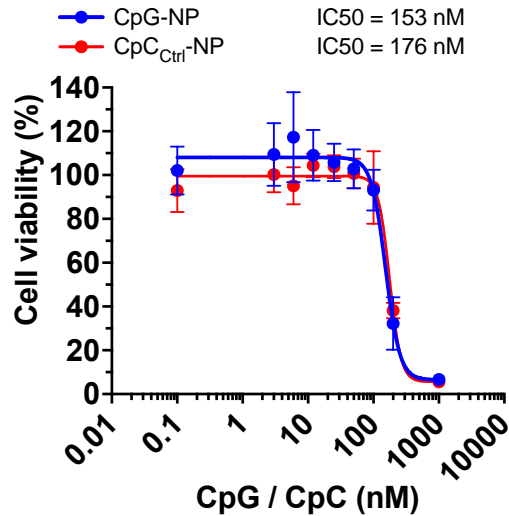

**Figure S9:** Cell viability profile of different concentrations of CpG-NPs and CpC-Crt-NP were analyzed 24 h post treatment. Samples were normalized to untreated cells. Data are represented as mean ± SD (n = 3).

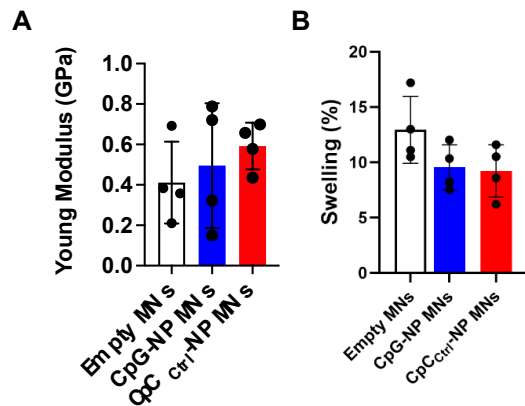

**Figure S10:** Characterization of the mechanical properties of HA-based MNs. **A**, A compression test was performed to compare the mechanical strength of empty MNs versus CpG-NP-loaded MNs and CpC<sub>ctrl</sub>-NP-loaded MNs. Data are means  $\pm$  s.e.m. (n = 4). **B**, Analysis of the swelling ability *in vitro* by weight measurement. Data are means  $\pm$  s.e.m. (n = 4).

**Table S2:** Assessment of CpG-NP release profile *in vivo* when delivered with HA-based MNs by tracking the fluorescence intensity of labeled NPs over time. Data are means  $\pm$  s.e.m. (n = 4).

| MN administration time (H) | % CpG-NPs released |
|----------------------------|--------------------|
| 3                          | -                  |
| 6                          | 57 $\pm$ 18%       |
| 24                         | 52 $\pm$ 12%       |

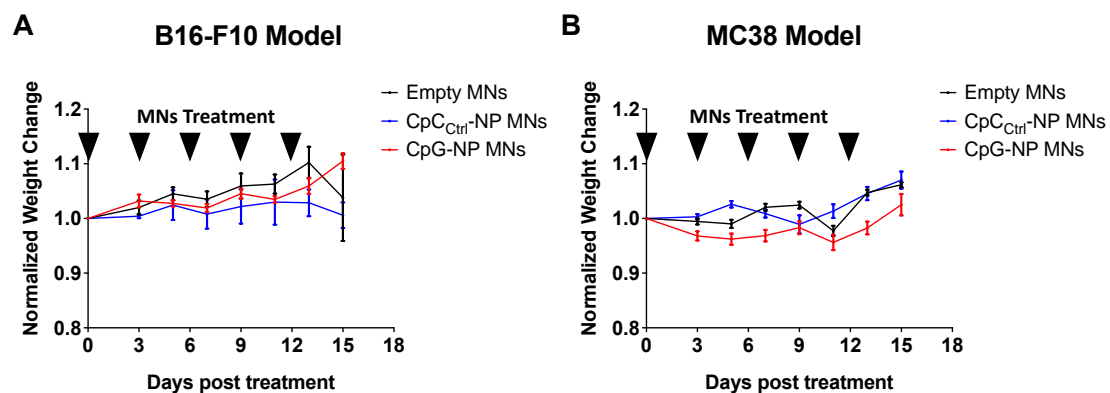

**Figure S11:** Mice body weight following Empty MNs, CpCCtrl-NP MNs, and CpG-NP MNs therapy in melanoma B16-F10 model (A) and colon MC38 model (B). Mice with 20-40 mm<sup>3</sup> tumors were treated five times, 3 days apart. Body weight was measured every other day.

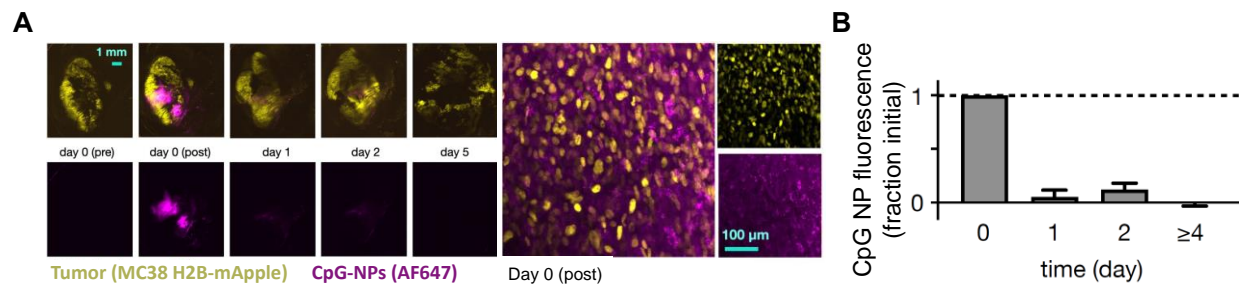

**Figure S12:** **A**, IVM of MC38-mApple tumors (yellow) injected fluorescent CpG-NPs intratumorally (magenta) (left, scale bar: 1 mm; right, scale bar: 100  $\mu$ m). **B**, Quantification of the fluorescence intensity of CpG-NPs within tumor tissue, following intratumoral injection. Data are normalized to fluorescence levels observed immediately after injection (day 0). Data are means  $\pm$  std. dev. (n = 3).

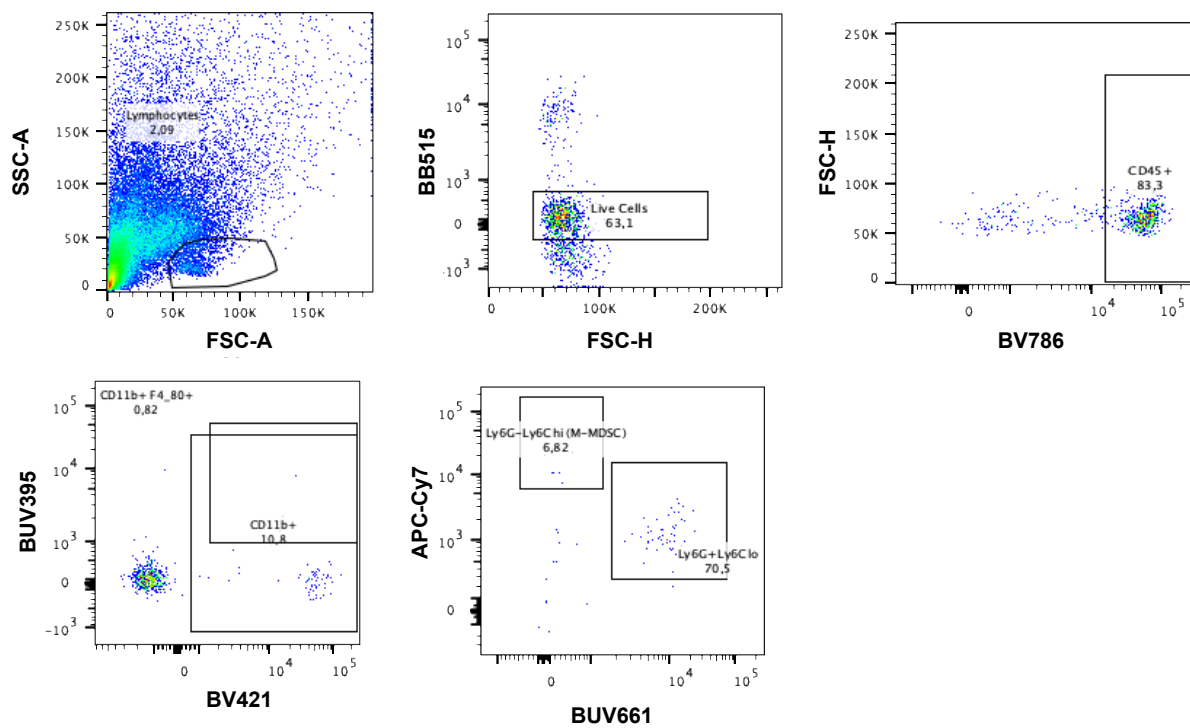

**Figure S13:** Macrophages gating strategy by flow cytometry when analyzing cells recovered from ISF using microneedles.

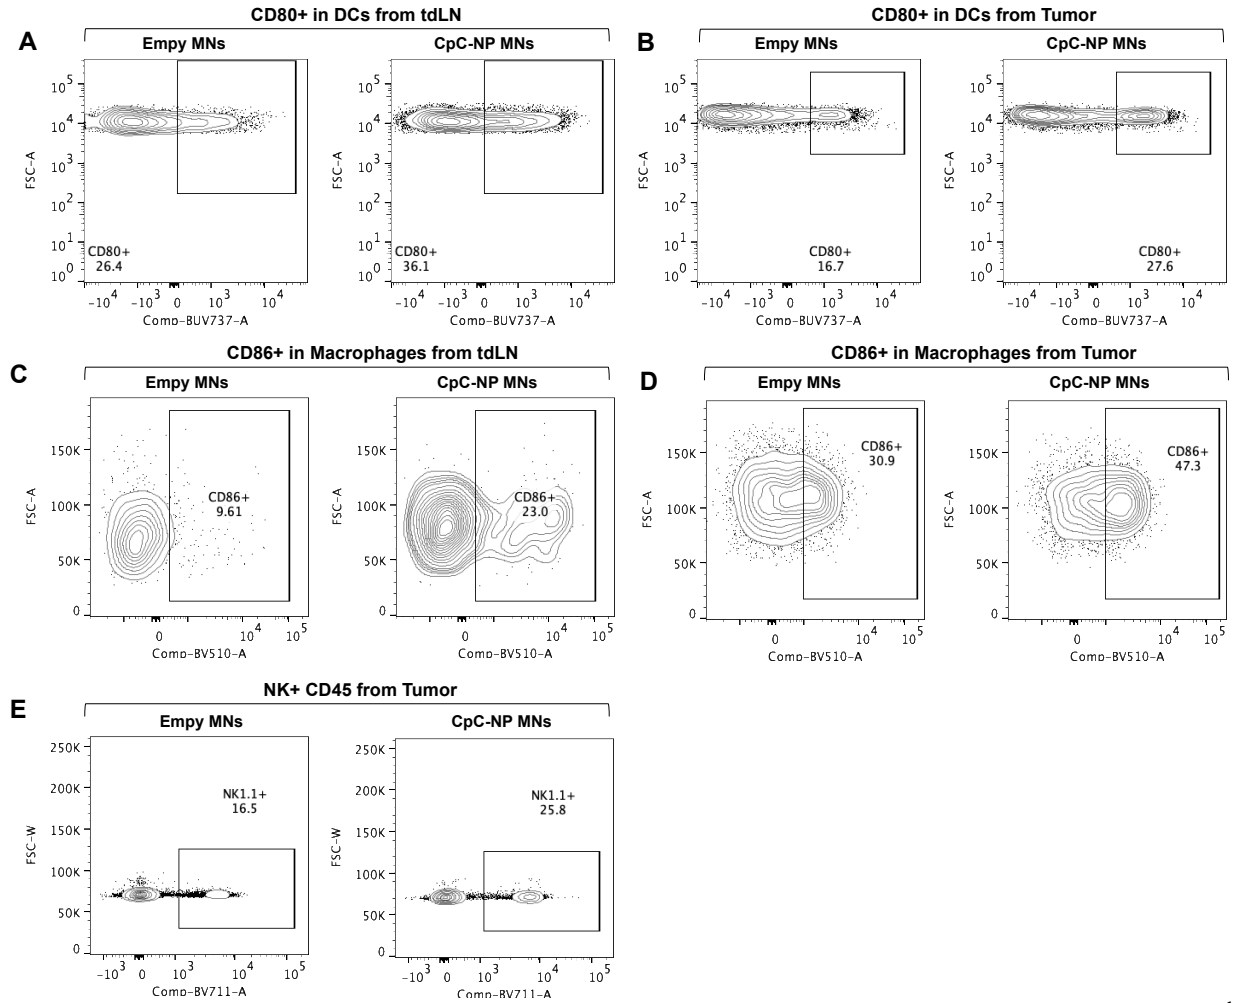

**Figure S13:** Representative flow cytometry density plot of activated dendritic cells (CD80<sup>hi</sup> CD11c<sup>+</sup>MHCII<sup>+</sup>CD45<sup>+</sup>) in tdLNs (A) and tumors (B) 48 h post transdermal delivery of CpG-NPs. c,d, Representative flow cytometry density plot of activated macrophages (CD86<sup>hi</sup> F4/80<sup>+</sup>CD11b<sup>+</sup>CD45<sup>+</sup>) in tdLNs (C) and tumors (D) 48 h post transdermal delivery of CpG-NPs. E, Representative flow cytometry density plot of natural killer cells in tumor lysates 48 h post-treatment with CpG-NPs.

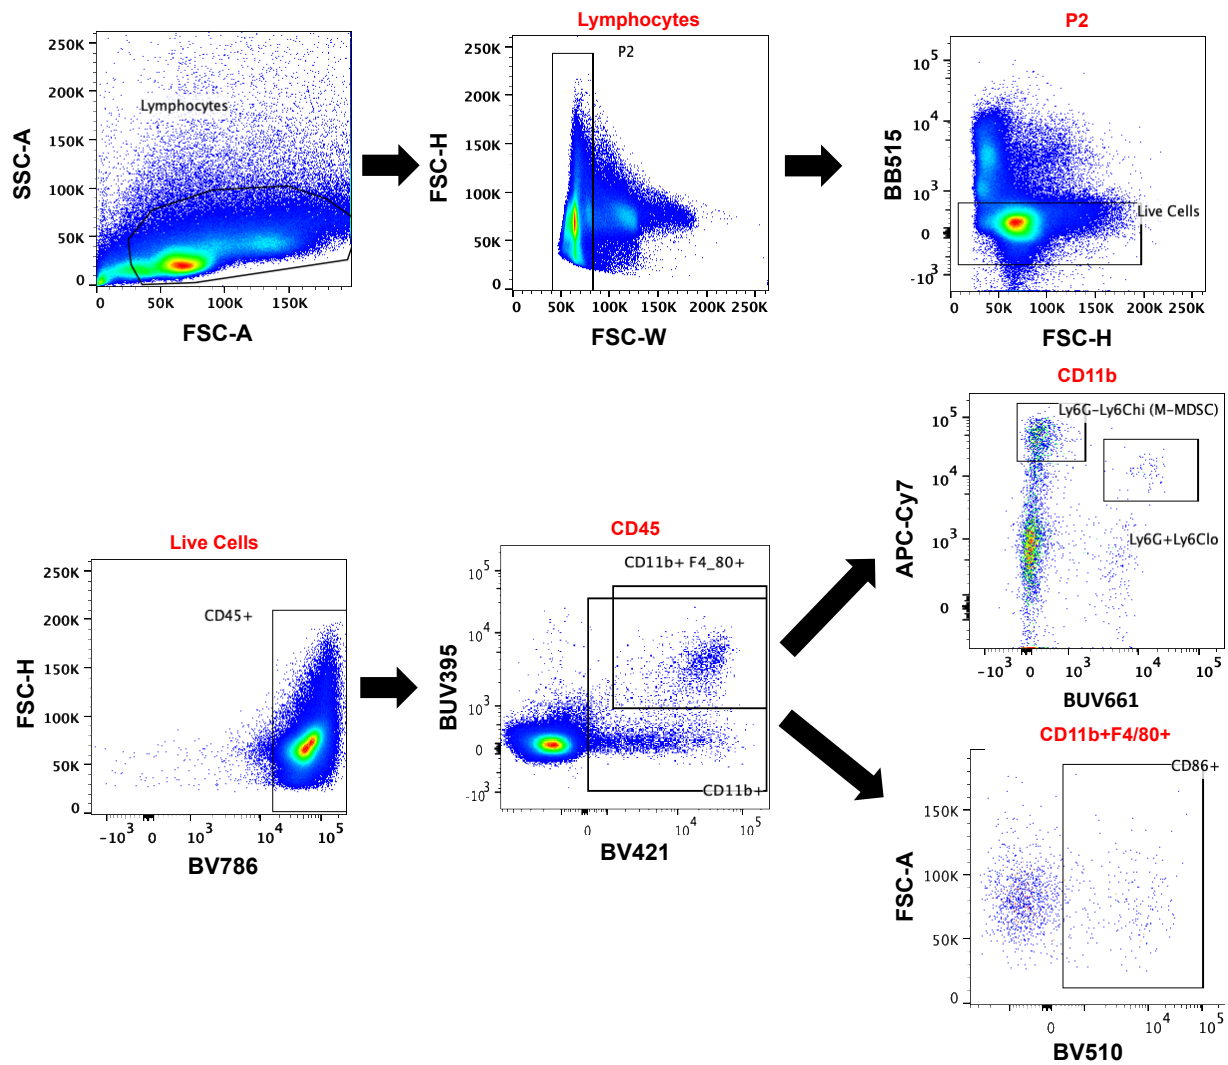

**Figure S14:** Macrophages gating strategy by flow cytometry.

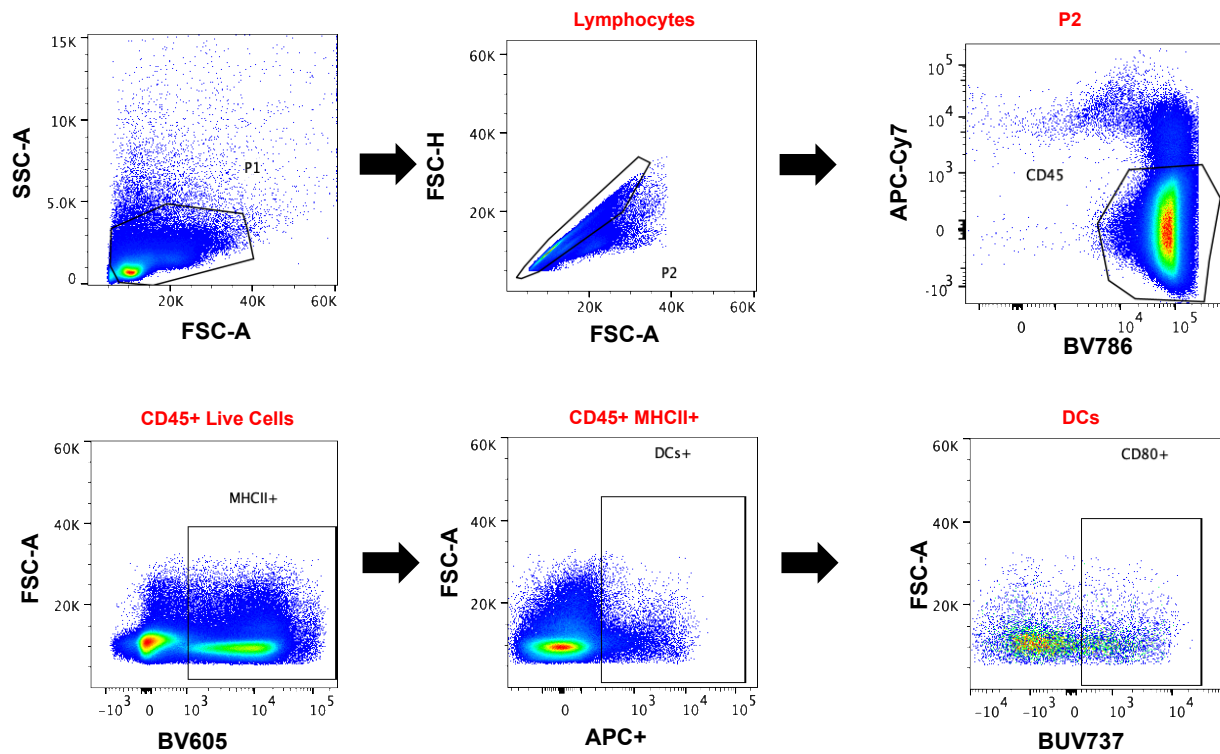

**Figure S15:** Dendritic Cells gating strategy by flow cytometry.

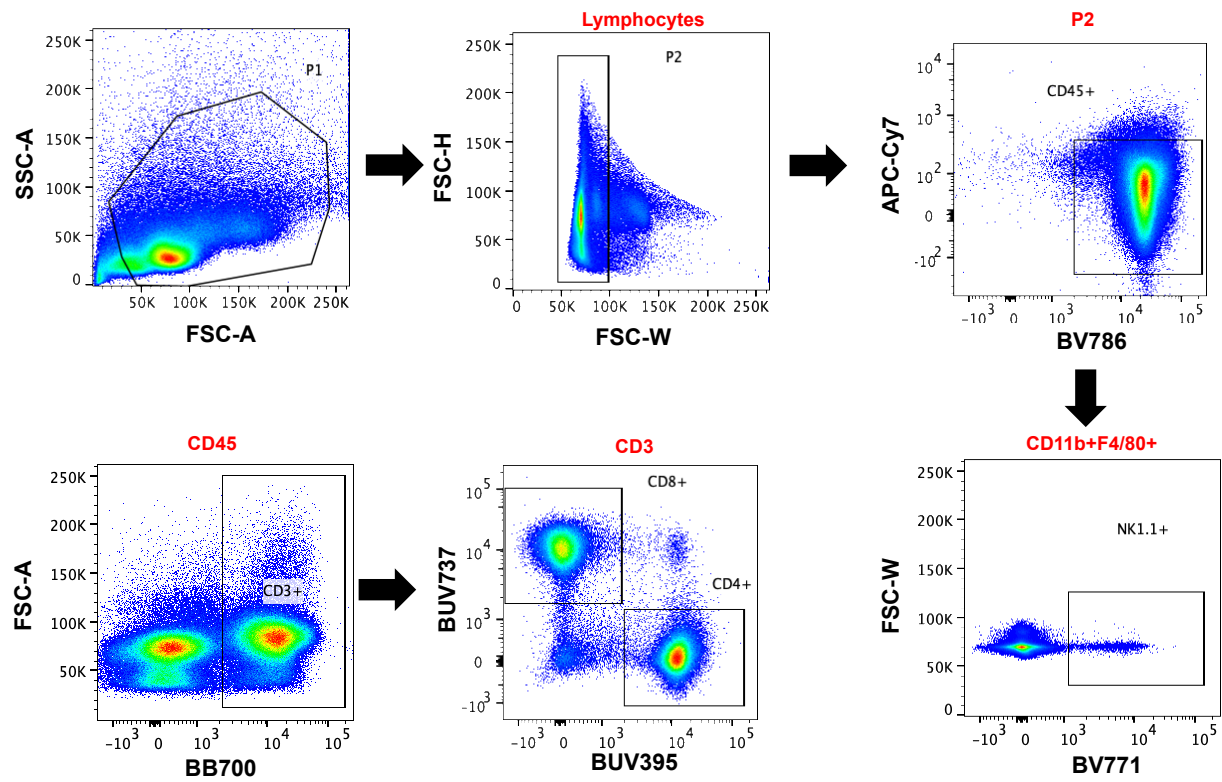

**Figure S16:** T Cells gating strategy by flow cytometry.
